# Supplementary material for: Comprehensive analysis reveals potential therapeutic targets and an integrated risk stratification model for solitary fibrous tumors
Source: Springer Nature journal article supplement (doi:10.1038/s41467-023-43249-4), 2023-11-18
Supplement: MOESM1 [file 41467_2023_43249_MOESM1_ESM.pdf]

## **Supplementary Information**

### **Comprehensive analysis reveals potential therapeutic targets and an integrated risk stratification model for solitary fibrous tumors**

Renjing Zhang<sup>1,2#</sup>, Yang Yang<sup>3#</sup>, Chunfang Hu<sup>4#</sup>, Mayan Huang<sup>1,5#</sup>, Wenjian Cen<sup>1,2#</sup>, Dongyi Ling<sup>1,2</sup>, Yakang Long<sup>1,2</sup>, Xin-Hua Yang<sup>1,2</sup>, Boheng Xu<sup>1,2</sup>, Junling Peng<sup>1,2</sup>, Sujie Wang<sup>1,2</sup>, Weijie Zhu<sup>1,2</sup>, Mingbiao Wei<sup>1,2</sup>, Jiaojiao Yang<sup>1,2</sup>, Yuxia Xu<sup>1,2</sup>, Xu Zhang<sup>1,2</sup>, Jiangjun Ma<sup>1,2</sup>, Fang Wang<sup>1,2</sup>, Hongtu Zhang<sup>4</sup>, Peiqing Ma<sup>4</sup>, Xiaojun Zhu<sup>1,6</sup>, Guohui Song<sup>1,6</sup>, Li-Yue Sun<sup>7</sup>, De-Shen Wang<sup>1,8</sup>, Feng-Hua Wang<sup>1,8</sup>, Yu-Hong Li<sup>1,8</sup>, Sandro Santagata<sup>9</sup>, Qin Li<sup>10,11\*</sup>, Yan-Fen Feng<sup>1,5\*</sup>, Ziming Du<sup>1,2\*</sup>

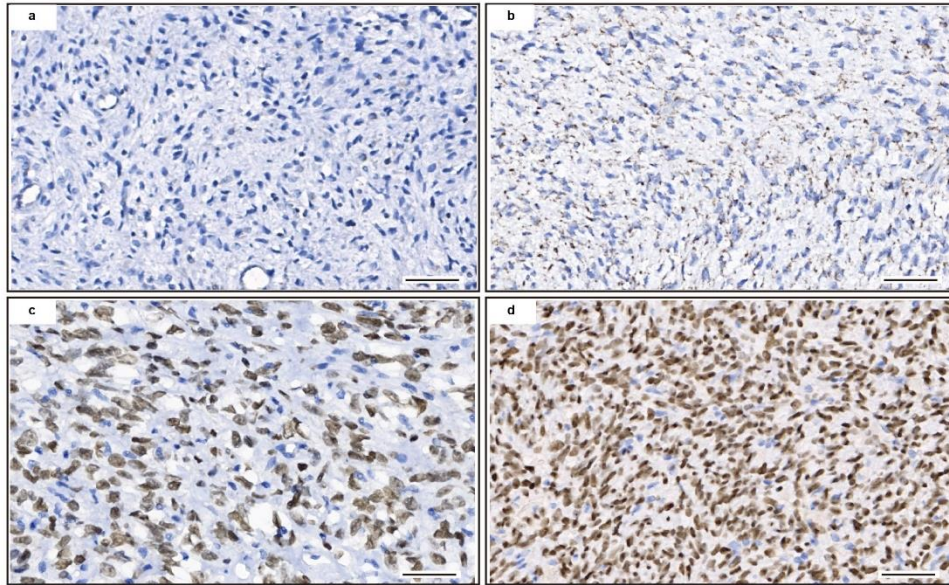

**Supplementary Fig. 1: STAT6 staining in solitary fibrous tumors.** Nuclear and cytoplasmic staining was qualitatively scored as 0 (absent to minimal blush or staining of <10% of cells, any intensity), or 1+ (present in 10% or more of cells, weak physiologic stain equivalent to intensity seen in intratumoral lymphocytes), or 2+ (moderate overexpression), or 3+ (high-level overexpression). **a**, Representative image of score 0, both nuclear and cytoplasmic are absent of stain. **b**, Score 1+, cytoplasmic stain. **c**, Score 2+, moderate nuclear stain. **d**, Score 3+, strong nuclear stain. (Scale bar = 50  $\mu\text{m}$ )

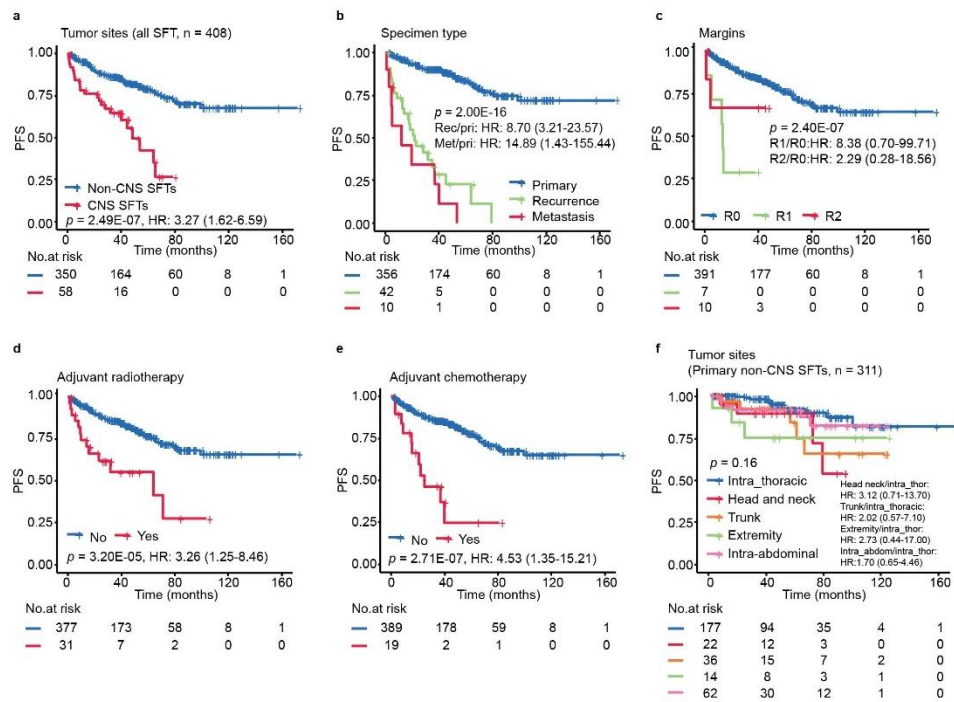

**Supplementary Fig. 2: Prognostic value of clinical variables in all 408 SFTs from four cohorts.** **a**, Kaplan-Meier plots showing PFS for CNS SFTs and non-CNS SFTs. **b**, Kaplan-Meier plots showing PFS for primary SFTs, recurrent SFTs and metastatic SFTs. **c**, Kaplan-Meier plots showing PFS for the SFTs with tumor margin of R0, R1 and R2. **d**, Kaplan-Meier plots showing PFS for the SFT patients with or without adjuvant radiotherapy. **e**, Kaplan-Meier plots showing PFS for the SFT patients with or without adjuvant chemotherapy. **f**, Kaplan-Meier plots showing PFS for the non-CNS SFTs originated from different sites.  $p$  values were calculated using two-sided log-rank test. SFT Solitary Fibrous Tumor; CNS Central Nervous System; HR Hazard Ratio; R0 Microscopic Complete; R1 Microscopic Incomplete; R2 Macroscopic Incomplete; PFS Progression Free Survival.

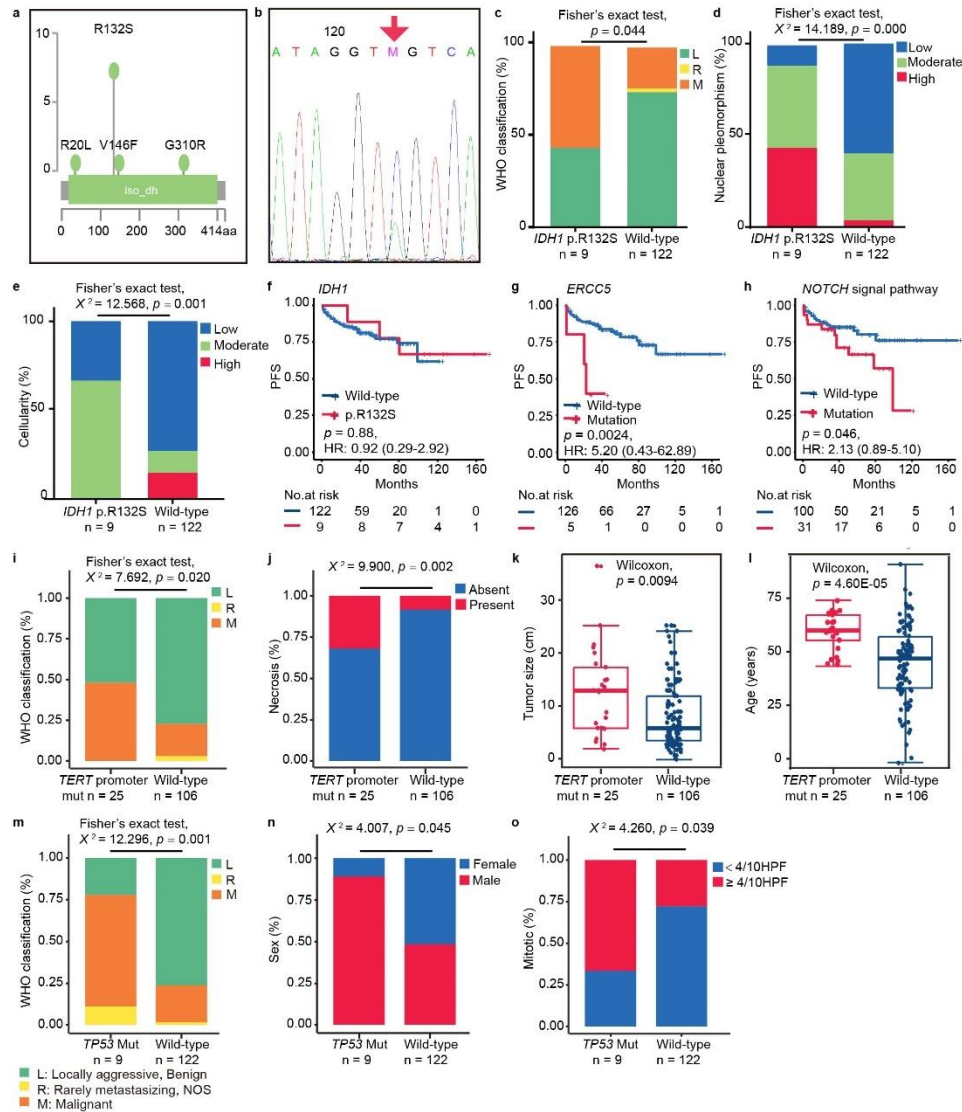

**Supplementary Fig. 3: The association between gene mutations and clinicopathologic parameters.** **a**, Mutant lollipop indicated the hotspot mutation site of *IDH1* p.R132S (n = 7) in SFTs. **b**, Sanger sequencing confirmed *IDH1* p.R132S mutation in 7 SFTs in SYSUCC cohort. **c-f**, *IDH1* p.R132S mutation was associated with WHO classification, nuclear pleomorphism and cellularity but not associated with patients PFS.  $p$  values were calculated using two-sided log-rank test (f). **g-h**, Kaplan-Meier plots showing PFS for patients who had mutation and wild type of *ERCC5*, *NOTCH* signal pathway,  $p$  values were calculated using two-sided log-rank test. **i-l**, *TERT* promoter region mutations were enriched in malignant tumor in WHO classification, tumors with necrosis, and positively correlated with large size of tumors (tumor size: 13.00

(IQR: 6.00-17.65) cm vs 6.05 (IQR: 3.75-12.13) cm) and age of the patients (age: 61.00 (IQR: 55.50-67.00) years vs 50.00 (IQR: 38.00-59.25) years). Box center lines, bounds of the box, and whiskers indicate medians, first and third quartiles, and minimum and maximum values within  $1.5 \times \text{IQR}$  (interquartile range) of the box limits, respectively. *p* values were calculated using Wilcoxon test (k, l). **m-o**, *TP53* mutations were enriched in malignant tumors in WHO classification, male patients, and high mitotic tumors. WHO World Health Organization; PFS Progression Free Survival; HR Hazard Ratio.

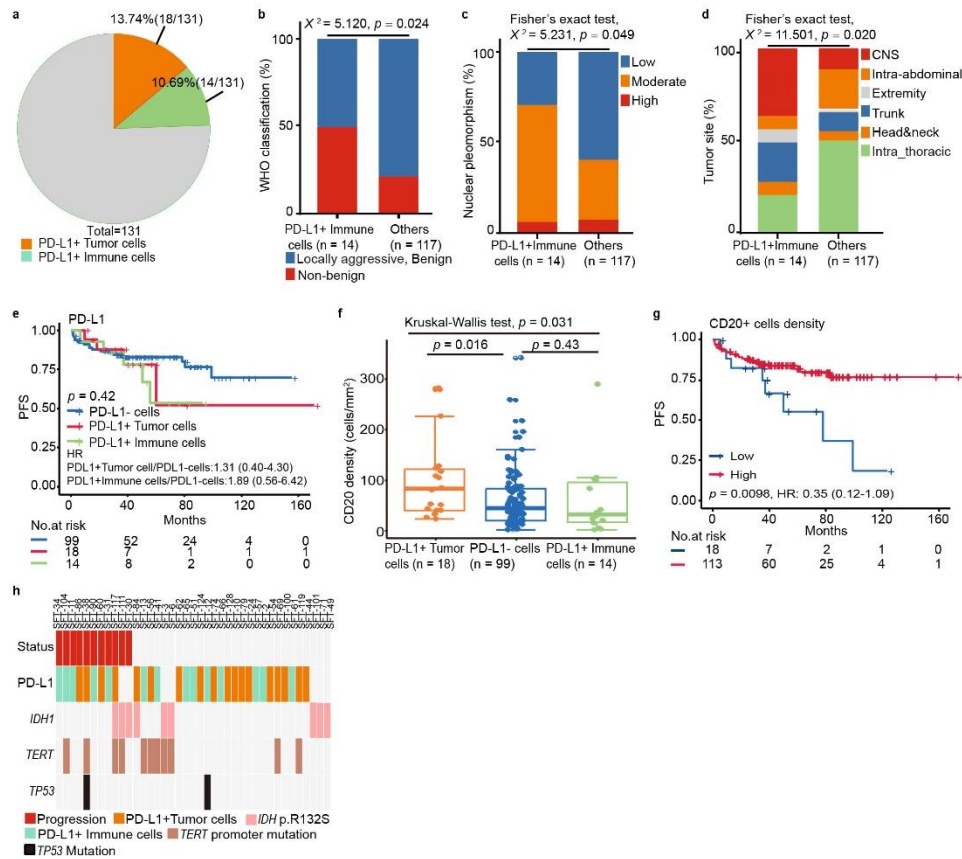

**Supplementary Fig. 4: High density of macrophages and high PD-L1 expression were found in SFTs.** **a**, PD-L1 was highly expressed in 13.74% (18/131) of SFT tissues in tumor cells, and 10.69% (14/131) of SFT tissues in immune cells (mostly macrophages). **b-d**, High immune cells expressing PD-L1 was enriched in malignant or rarely metastasizing samples in WHO classification, high nuclear pleomorphism, and in SFTs originated from CNS. **e**, Kaplan-Meier plots showing PFS for patients with PD-L1+ tumor cells, patients with PD-L1+ immune cells, and patients with PD-L1- cells,  $p$  values were calculated using two-sided log-rank test. **f**, High density of CD20+ B cells was enriched in SFTs with tumor cells expressing PD-L1 (the median density of B cells in PD-L1 + tumor cell, others and PD-L1+ immune cells tissues were 86.25 (IQR: 42.10-129.18), 47.70 (IQR: 22.30-87.60), 34.55 (IQR: 13.98-103.98) cells/mm<sup>2</sup>). Box center lines, bounds of the box, and whiskers indicate medians, first and third quartiles, and minimum and maximum values within 1.5×IQR

(interquartile range) of the box limits, respectively. *p* values were calculated using Kruskal-Wallis test. **g**, Kaplan-Meier plots showing PFS for patients with high or low density of CD20+ B cells infiltrated in SFTs tissues. *p* values were calculated using two-sided log-rank test. **h**, Oncoprint plot showing the distribution of high PD-L1 expression and gene alteration of *IDH1*, *TERT*, and *TP53* in SFTs from SYSUCC cohort. WHO World Health Organization; CNS Central Nervous System; PFS Progression Free Survival; HR Hazard Ratio.



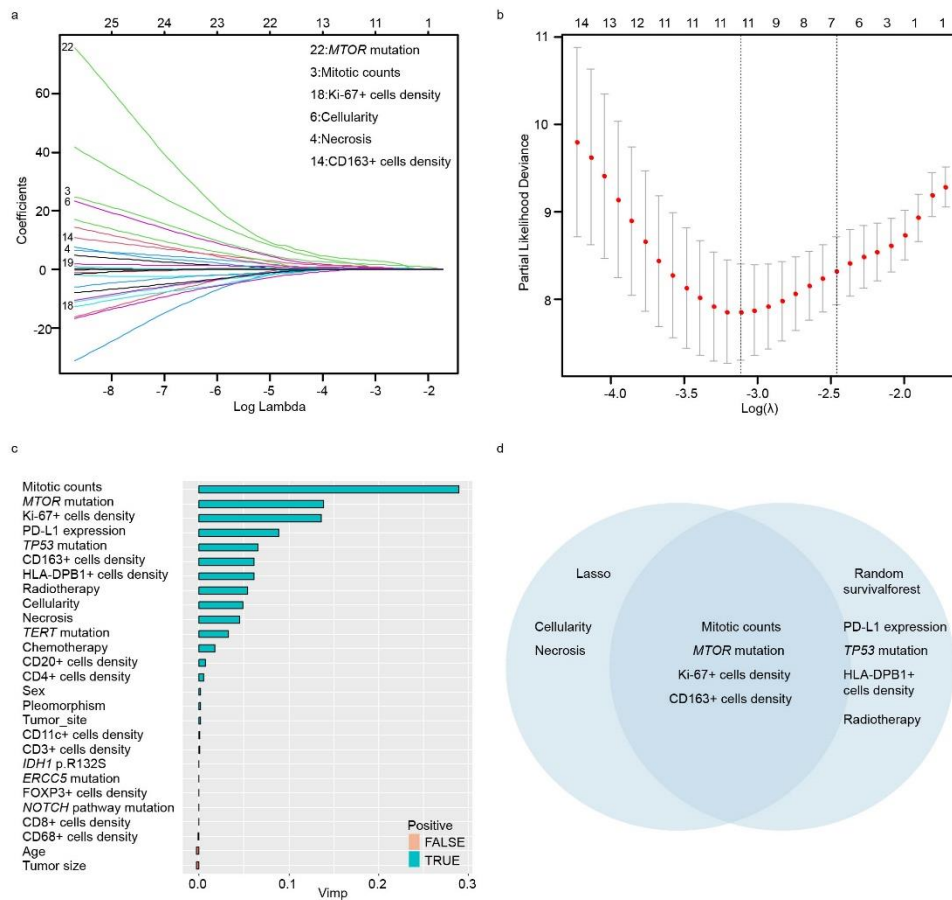

**Supplementary Fig. 5: Evaluation of variables for integrated risk model. a**, LASSO regression was used to screen and rank variables which initially included clinical and histopathological factors (including mitotic count, necrosis, age, sex, tumor size, tumor site, cellularity and nuclear pleomorphism), immunohistochemical factors (including the density of cells which are Ki-67+, CD68+, CD163+, HLA-DPB1+, PD-L1+, CD3+, CD4+, CD8+, FOXP3+, CD11c+, CD20, receptively ) and molecular factors (including *MTOR* mutation, *NOTCH* pathway mutation (*NOTCH1*, *NOTCH2*, *NOTCH3*, *CREBBP*), *ERCC5* mutation, *TP53* mutation, *TERT* promoter region mutation and *IDH1* mutation). **b**, LASSO regression cross-validation, fitting, and selection of models. **c**, the variables screened and ranked by random survival forest VIMP according to their importance. **d**, The common variables selected by both LASSO regression and random survival forest.



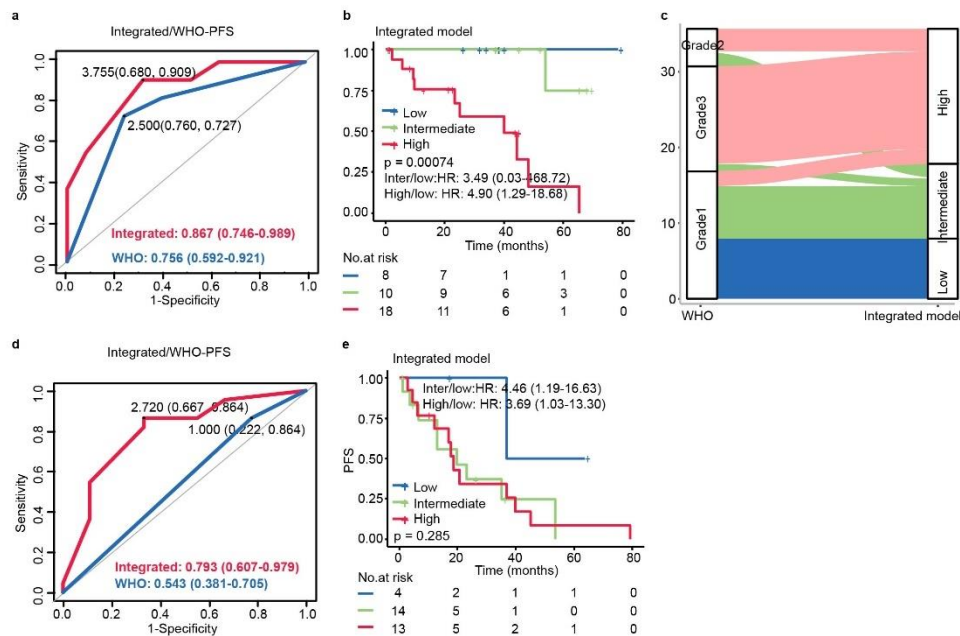

**Supplementary Fig. 6: The performance of integrated risk model in primary CNS SFTs with NTM and relapsed non-CNS SFTs with NTM. a,** ROC curves for integrated risk model, WHO grade in primary CNS SFTs with NTM from four cohorts. **b,** Kaplan-Meier plots showing PFS for primary CNS SFTs with NTM stratified by integrated risk model,  $p$  values were calculated using two-sided log-rank test. **c,** Sankey diagram showing the intersection of the SFT patients stratified by both WHO classification and integrated risk model. **d,** ROC curves for integrated risk model, WHO classification in relapsed non-CNS SFTs with NTM from the four cohorts. **e,** Kaplan-Meier plots showing PFS for relapsed non-CNS SFTs with NTM stratified by integrated risk model,  $p$  values were calculated using two-sided log-rank test. PFS Progression Free Survival; HR Hazard Ratio; WHO World Health Organization; Source data are provided as a Source Data file.

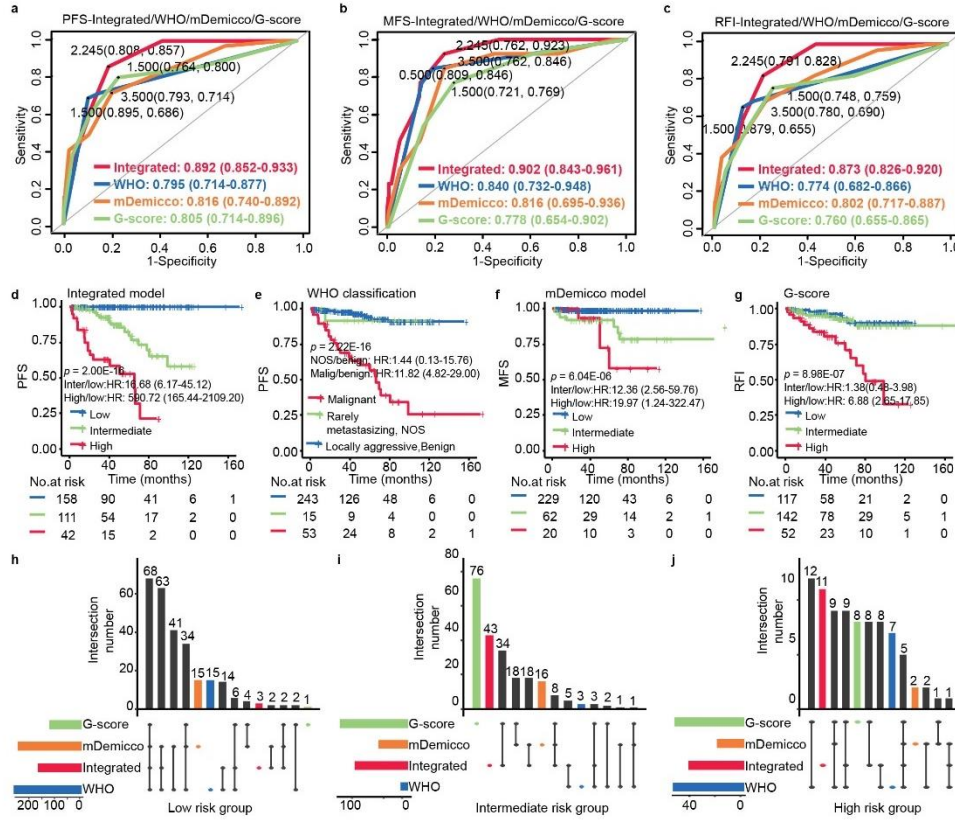

**Supplementary Fig. 7: Comparison of the integrated risk model to WHO classification and published models under the stricter criteria.** All primary non-CNS SFTs with NTM from four cohorts were included ( $n = 311$ ), and in addition to PFS, MFS and RFI were also used as outcome indicator to compare. **a-c**, ROC curves based on PFS, MFS and RFI for integrated risk model, WHO classification, mDemico model, and G-score, respectively in discovery SYSUCC cohort and the three validation cohorts (FAHSYSU and CHCAMS 1 and CHCAMS 2). Kaplan-Meier plots showing PFS for the patients stratified by integrated risk model (**d**) and WHO classification (**e**), MFS for mDemico model (**f**), and RFI for G-score (**g**) in all primary non-CNS SFTs with NTM from four cohorts ( $n = 311$ ),  $p$  values were calculated using two-sided log-rank test. **h-j**, Upset diagrams showing overlap of SFTs as low-risk, intermediate-risk and

high-risk group, stratified by integrated model, WHO classification, mDemicco model and G-score. PFS Progression Free Survival; MFS Metastasis Free Survival; RFI Recurrence Free Interval; WHO World Health Organization; HR Hazard Ratio; Source data are provided as a Source Data file.

**Supplementary Table 1: Scoring of STAT6 immunohistochemical staining in the discovery cohort and three validation cohorts.**

| Cohorts         | Score 3     | Score 2     | Score 1   | Score 0   |
|-----------------|-------------|-------------|-----------|-----------|
| SYSUCC cohort   | 92 (70.23%) | 28 (21.37%) | 8 (6.11%) | 3 (2.29%) |
| FAHSYSU cohort  | 85 (73.91%) | 28 (24.35%) | 2 (1.74%) | 0 (0.00%) |
| CHCAMS cohort 1 | 83 (82.18%) | 14 (13.86%) | 3 (2.97%) | 1 (0.99%) |
| CHCAMS cohort 2 | 49 (80.33%) | 11 (18.03%) | 1 (1.64%) | 0 (0.00%) |

**Supplementary Table 2: Detection of *NAB2-STAT6* fusion gene by RT-PCR and sanger sequencing.**

| ID            | Year of specimen | RNA concentration (ng/ul) | NAB2ex3-STAT6ex2 | NAB2ex2-STAT6ex5 | NAB2ex4-STAT6ex5 | NAB2ex6-STAT6ex18 | NAB2ex6-STAT6ex16 | NAB2ex5-STAT6ex18 | NAB2ex5-STAT6ex3 | NAB2ex2-STAT6ex19 | GAPDH |
|---------------|------------------|---------------------------|------------------|------------------|------------------|-------------------|-------------------|-------------------|------------------|-------------------|-------|
| SYSUCC-SFT-5  | 2011             | 552.40                    | ✓                | ×                | ×                | ×                 | ×                 | ×                 | ×                | ×                 | ✓     |
| SYSUCC-SFT-12 | 2016             | 117.00                    | ×                | ×                | ×                | ×                 | ×                 | ×                 | ×                | ×                 | ✓     |
| SYSUCC-SFT-31 | 2013             | 920.50                    | ✓                | ×                | ×                | ×                 | ×                 | ×                 | ×                | ×                 | ✓     |
| SYSUCC-SFT-49 | 2013             | 214.50                    | ×                | ×                | ×                | ×                 | ×                 | ×                 | ×                | ×                 | ✓     |
| SYSUCC-SFT-58 | 2015             | 1082.00                   | ✓                | ×                | ×                | ×                 | ×                 | ×                 | ×                | ×                 | ✓     |
| SYSUCC-SFT-65 | 2014             | 245.80                    | ✓                | ×                | ×                | ×                 | ×                 | ×                 | ×                | ×                 | ✓     |
| SYSUCC-SFT-66 | 2018             | 89.20                     | ×                | ×                | ×                | ×                 | ×                 | ×                 | ×                | ×                 | ✓     |
| SYSUCC-SFT-71 | 2011             | 460.10                    | ×                | ✓                | ×                | ×                 | ×                 | ×                 | ×                | ×                 | ✓     |
| SYSUCC-SFT-76 | 2016             | N/A                       | N/A              | N/A              | N/A              | N/A               | N/A               | N/A               | N/A              | N/A               | N/A   |
| SYSUCC-SFT-84 | 2008             | N/A                       | N/A              | N/A              | N/A              | N/A               | N/A               | N/A               | N/A              | N/A               | N/A   |
| SYSUCC-SFT-89 | 2014             | 690.10                    | ×                | ×                | ×                | ×                 | ×                 | ×                 | ×                | ×                 | ✓     |

× Not detected; ✓ Detected; N/A Not applied (failure of RNA extraction).

**Supplementary Table 3: Univariate analysis for PFS in primary CNS SFTs with NTM from all four cohorts (n = 36).**

| Clinicopathologic feature | Number      | Univariate analysis |         |
|---------------------------|-------------|---------------------|---------|
|                           |             | HR (95%CI)          | P value |
| Sex                       |             |                     | 0.383   |
| Male                      | 17 (47.22%) | 1.67 (0.51-5.55)    |         |
| Female                    | 19 (52.78%) | 1.00                |         |
| Age at diagnosis (years)  |             |                     | 0.987   |
| ≥ 55                      | 11 (30.56%) | 1.01 (0.30-3.46)    |         |
| < 55                      | 25 (69.44%) | 1.00                |         |
| Tumor size (cm)           |             |                     | 0.413   |
| D < 5                     | 18 (50.00%) | 1.00                |         |
| 5 ≤ D < 10                | 17 (47.22%) | 2.24 (0.68-7.34)    |         |
| 10 ≤ D < 15               | 1 (2.78%)   | 0.34 (0.00-96.52)   |         |
| 15 ≤ D                    | NA          |                     |         |
| Cellularity               |             |                     | 0.058   |
| Low                       | 14 (38.89%) | 1.00                |         |
| Moderate                  | 7 (19.44%)  | 3.98 (1.00-15.88)   |         |
| High                      | 15 (41.67%) | 0.96 (0.16-5.67)    |         |
| Necrosis                  |             |                     | 0.030   |
| Absent                    | 33 (91.67%) | 1.00                |         |
| Present                   | 3 (8.33%)   | 4.55 (0.28-75.17)   |         |
| Nuclear pleomorphism      |             |                     | 0.350   |
| Low                       | 7 (19.44%)  | 1.00                |         |
| Moderate                  | 22 (61.11%) | 4.20 (1.06-16.60)   |         |
| High                      | 7 (19.44%)  | 3.43 (0.33-35.85)   |         |
| Mitoses/10 HPF            |             |                     | 0.013   |
| 0-4                       | 17 (47.22%) | 1.00                |         |
| ≥ 5                       | 19 (52.78%) | 5.44 (1.66-17.82)   |         |
| 2021 CNS WHO Grade        |             |                     | 0.011   |
| Grade1                    | 17 (47.22%) | 1.00                |         |
| Grade2                    | 5 (13.89%)  | 2.50 (0.12-52.08)   |         |
| Grade3                    | 14 (38.89%) | 7.01 (1.93-25.42)   |         |
| Radiotherapy              |             |                     | 0.091   |
| No                        | 26 (72.22%) | 1.00                |         |
| Yes                       | 10 (27.78%) | 2.66 (0.56-12.49)   |         |
| Chemotherapy              |             |                     | 0.080   |
| No                        | 35 (97.22%) | 1.00                |         |
| Yes                       | 1 (2.78%)   | 5.11 (0.07-379.81)  |         |

HR Hazard Ratio; CI Confidence Interval; D Diameter; HPF High Power Field; CNS Central Nervous System; WHO World Health Organization; NA Not applied. *P* values were calculated using two-sided log-rank test.

**Supplementary Table 4: Univariate analysis for PFS in relapsed non-CNS SFTs with NTM from all four cohorts (n = 31).**

| Clinicopathologic feature  | Number      | Univariate analysis |         |
|----------------------------|-------------|---------------------|---------|
|                            |             | HR (95%CI)          | P value |
| Sex                        |             |                     | 0.776   |
| Male                       | 18 (58.06%) | 0.89 (0.38-2.07)    |         |
| Female                     | 13 (41.94%) | 1.00                |         |
| Age at diagnosis (years)   |             |                     | 0.676   |
| ≥ 55                       | 17 (54.84%) | 0.85 (0.36-1.98)    |         |
| < 55                       | 14 (45.16%) | 1.00                |         |
| Tumor size (cm)            |             |                     | 0.614   |
| D < 5                      | 15 (48.39%) | 1.00                |         |
| 5 ≤ D < 10                 | 6 (19.35%)  | 0.72 (0.24-2.13)    |         |
| 10 ≤ D < 15                | 5 (16.13%)  | 1.55 (0.42-5.81)    |         |
| 15 ≤ D                     | 5 (16.13%)  | 1.13 (0.36-3.52)    |         |
| Cellularity                |             |                     | 0.198   |
| Low                        | 11 (35.48%) | 1.00                |         |
| Moderate                   | 14 (45.16%) | 0.38 (0.12-1.21)    |         |
| High                       | 6 (19.35%)  | 0.74 (0.24-2.30)    |         |
| Necrosis                   |             |                     | 0.098   |
| Absent                     | 29 (93.55%) | 1.00                |         |
| Present                    | 2 (6.45%)   | 3.09 (0.28-34.08)   |         |
| Nuclear pleomorphism       |             |                     | 0.239   |
| Low                        | 5 (16.13%)  | 1.00                |         |
| Moderate                   | 22 (70.97%) | 2.87 (1.02-8.09)    |         |
| High                       | 4 (12.90%)  | 4.29 (0.58-31.73)   |         |
| Specimen type              |             |                     | 0.630   |
| Recurrence                 | 23 (74.19%) | 0.81 (0.32-2.06)    |         |
| Metastasis                 | 8 (25.81%)  | 1.00                |         |
| WHO classification         |             |                     | 0.479   |
| Locally aggressive, Benign | 5 (16.13%)  | 1.00                |         |
| Rarely metastasizing, NOS  | --          | --                  |         |
| Malignant                  | 26 (83.87%) | 1.53 (0.53-4.39)    |         |
| Mitoses / 10 HPF           |             |                     | 0.172   |
| < 4                        | 8 (25.81%)  | 1.00                |         |
| ≥ 4                        | 23 (74.19%) | 2.02 (0.82-4.98)    |         |
| Radiotherapy               |             |                     | 0.268   |
| No                         | 27 (87.10%) | 1.00                |         |
| Yes                        | 4 (12.90%)  | 2.20 (0.28-17.05)   |         |
| Chemotherapy               |             |                     | 0.639   |
| No                         | 25 (80.65%) | 1.00                |         |
| Yes                        | 6 (19.35%)  | 0.78 (0.29-2.13)    |         |

HR Hazard Ratio; CI Confidence Interval; D Diameter; WHO World Health Organization; NOS Not Otherwise Specified; HPF High Power Field; -- Undefined, *P* values were calculated using two-sided log-rank test.



**Supplementary Table 5: Detection of *IDH1* p.R132S mutation by sanger sequencing in seven SFTs in SYSUCC cohort.**

| ID             | Variant |
|----------------|---------|
| SYSUCC-SFT-3   | p.R132S |
| SYSUCC-SFT-6   | p.R132S |
| SYSUCC-SFT-49  | p.R132S |
| SYSUCC-SFT-71  | p.R132S |
| SYSUCC-SFT-101 | p.R132S |
| SYSUCC-SFT-111 | p.R132S |
| SYSUCC-SFT-117 | p.R132S |

**Supplementary Table 6: Prediction of *MTOR* damaging mutation by Polyphen-2-HumDiv & SIFT & COSMIC.**

| ID              | cHGVS & pHGVS          | Polyphen-2-HumDiv | Score | SIFT      | Score | COSMIC<br>FATHMM<br>prediction | Score | somatic |
|-----------------|------------------------|-------------------|-------|-----------|-------|--------------------------------|-------|---------|
| FAHSYSU-SFT-38  | c.3940 G>A,p.A1314T    | Probably damaging | 0.993 | Damaging  | 0.030 | Pathogenic                     | 0.980 | yes     |
| FAHSYSU-SFT-40  | c.370 G>A,p.E124K      | Probably damaging | 0.968 | Tolerated | 0.301 | -                              | -     | -       |
| FAHSYSU-SFT-45  | c.3940 G>A,p.A1314T    | Probably damaging | 0.993 | Damaging  | 0.030 | Pathogenic                     | 0.980 | yes     |
|                 | c.3853 A>T,p.R1285*    | -                 | -     | -         | -     | -                              | -     | -       |
| FAHSYSU-SFT-49  | c.370 G>A,p.E124K      | Probably damaging | 0.968 | Tolerated | 0.301 | -                              | -     | -       |
| FAHSYSU-SFT-69  | c.370 G>A,p.E124K      | Probably damaging | 0.968 | Tolerated | 0.301 | -                              | -     | -       |
| FAHSYSU-SFT-76  | c.331 C>T,p.L111F      | Probably damaging | 1.000 | Damaging  | 0.002 | -                              | -     | -       |
| FAHSYSU-SFT-90  | c.3823 G>A, p.V1275I   | Possibly damaging | 0.841 | Tolerated | 0.264 | -                              | -     | -       |
|                 | c.3839 G>A, p.W1281*   | -                 | -     | -         | -     | -                              | -     | -       |
|                 | c.3935 C>T, p.P1312L   | Probably damaging | 1.000 | Damaging  | 0.006 | -                              | -     | -       |
|                 | c.3812C>A, p.A1271D    | Probably damaging | 0.998 | Damaging  | 0.004 | -                              | -     | -       |
| FAHSYSU-SFT-101 | c.323 C>T,p.A108V      | Possibly damaging | 0.870 | Damaging  | 0.022 | -                              | -     | -       |
| FAHSYSU-SFT-102 | c.5536 G>A,p.G1846S    | Benign            | 0.128 | Tolerated | 0.271 | -                              | -     | -       |
|                 | c.5555 A>G,p.E1852G    | Probably damaging | 0.991 | Tolerated | 0.087 | -                              | -     | -       |
| FAHSYSU-SFT-114 | c.5455 C>T,p.H1819Y    | Possibly damaging | 0.925 | Tolerated | 0.168 | Pathogenic                     | 0.990 | yes     |
|                 | c.5582 C>T,p.T1861I    | Benign            | 0.006 | Tolerated | 0.253 | -                              | -     | -       |
| CHCAMS-SFT-39   | c.3912 G>A, p.W1304*   | -                 | -     | -         | -     | Pathogenic                     | 0.990 | yes     |
| CHCAMS-SFT-40   | c.3805 T>C, p.W1269R   | Probably damaging | 0.990 | Damaging  | 0.000 | -                              | -     | -       |
| CHCAMS-SFT-65   | c.433 G>A, p.V145M     | Probably damaging | 0.995 | Damaging  | 0.002 | -                              | -     | -       |
| CHCAMS-SFT-90   | c.3844 G>A, p.E1282K   | Possibly damaging | 0.956 | Damaging  | 0.000 | -                              | -     | -       |
| SYSUCC-SFT-14   | c.2405T>C, p.I802T     | Probably damaging | 0.932 | Damaging  | 0.001 | -                              | -     | -       |
| SYSUCC-SFT-60   | c.3811G>A, p.A1271T    | Probably damaging | 0.999 | Tolerated | 0.423 | -                              | -     | -       |
| SYSUCC-SFT-98   | c.376G>A, p.A126T      | Possibly damaging | 0.761 | Damaging  | 0.018 | -                              | -     | -       |
| SYSUCC-SFT-130  | c.5506G>A, p.A1836T    | Probably damaging | 0.980 | Tolerated | 0.642 | -                              | -     | -       |
| CHCAMS2-SFT-2   | c.3820 A>T, p.R1274W   | Possibly damaging | 0.758 | -         | -     | -                              | -     | -       |
|                 | c.3834 AT>TG, p.D1278V | Probably damaging | 0.998 | -         | -     | -                              | -     | -       |
| CHCAMS2-SFT-23  | c.3844 G>A, p.E1282K   | Possibly damaging | 0.956 | -         | -     | -                              | -     | -       |
|                 | c.3854 G>A, p.R1285K   | Possibly damaging | 0.841 | -         | -     | -                              | -     | -       |
| CHCAMS2-SFT-58  | c.2410 G>C, p.E804Q    | Possibly damaging | 0.808 | -         | -     | -                              | -     | -       |

**Supplementary Table 7: Univariable analysis of the density of immune markers and Ki-67 with patient PFS in the SYSUCC cohort.**

| Immune microenvironment feature & Ki-67<br>(cells/mm <sup>2</sup> ) | Number (%)   | Univariate analysis |                |
|---------------------------------------------------------------------|--------------|---------------------|----------------|
|                                                                     |              | HR (95%CI)          | <i>P</i> value |
| CD3+ cells density                                                  |              |                     | 0.215          |
| ≥ 140.00                                                            | 61 (46.56%)  | 0.62 (0.29-1.30)    |                |
| < 140.00                                                            | 70 (53.44%)  | 1.00                |                |
| CD8+ cells density                                                  |              |                     | 0.074          |
| ≥ 21.20                                                             | 63 (48.09%)  | 2.01 (0.96-4.22)    |                |
| < 21.20                                                             | 68 (51.91%)  | 1.00                |                |
| CD68+ cells density                                                 |              |                     | 0.003          |
| ≥ 80.60                                                             | 43 (32.82%)  | 2.93 (1.32-6.52)    |                |
| < 80.60                                                             | 88 (67.18%)  | 1.00                |                |
| CD163+ cells density                                                |              |                     | 2.498E-06      |
| ≥ 929.30                                                            | 38 (29.01%)  | 4.93 (1.99-12.18)   |                |
| < 929.30                                                            | 93 (70.99%)  | 1.00                |                |
| FOXP3+ cells density                                                |              |                     | 0.003          |
| ≥ 3.80                                                              | 118 (90.08%) | 0.26 (0.05-1.35)    |                |
| < 3.80                                                              | 13 (9.92%)   | 1.00                |                |
| CD11c+ cells density                                                |              |                     | 0.104          |
| ≥ 13.20                                                             | 91 (69.47%)  | 2.18 (0.99-4.82)    |                |
| < 13.20                                                             | 40 (30.53%)  | 1.00                |                |
| CD4+ cells density                                                  |              |                     | 0.016          |
| ≥ 495.10                                                            | 58 (44.27%)  | 2.50 (1.18-5.30)    |                |
| < 495.10                                                            | 73 (55.73%)  | 1.00                |                |
| Ki-67+ cells density                                                |              |                     | 1.110E-16      |
| ≥ 454.70                                                            | 18 (13.74%)  | 11.58 (2.94-45.51)  |                |
| < 454.70                                                            | 113 (86.26%) | 1.00                |                |
| HLA-DPB1+ cells density                                             |              |                     | 0.007          |
| ≥ 4857.30                                                           | 18 (13.74%)  | 2.94 (0.94-9.21)    |                |
| < 4857.30                                                           | 113 (86.26%) | 1.00                |                |
| PD-L1 expression                                                    |              |                     | 0.419          |
| High expression in tumor cell                                       | 18 (13.74%)  | 1.32 (0.40-4.30)    |                |
| High expression in immune cell                                      | 14 (10.69%)  | 1.89 (0.56-6.42)    |                |
| Others                                                              | 99 (75.57%)  | 1                   |                |
| CD20+ cells density                                                 |              |                     | 0.010          |
| ≥ 16.5                                                              | 113 (86.26%) | 0.35 (0.12-1.09)    |                |
| < 16.5                                                              | 18 (13.74%)  | 1.00                |                |

HR Hazard Ratio; CI Confidence Interval; *P* values were calculated using two-sided log-rank test.

**Supplementary Table 8: Cumulative survival analysis of the patients stratified by integrated risk model in discovery cohort and three validation cohorts of primary non-CNS SFTs with NTM.**

| Cohorts                  | Number (%)  | 3 years PFS | 5 years PFS     | 10 years PFS |
|--------------------------|-------------|-------------|-----------------|--------------|
| SYSUCC cohort, n = 101   |             |             |                 |              |
| Low                      | 63 (62.38%) | 100%        | 100%            | 100%         |
| Intermediate             | 31 (30.69%) | 89%         | 67%             | 32%          |
| High                     | 7 (6.93%)   | 43%         | NA <sup>a</sup> | NA           |
| TFAHSYSU cohort, n = 71  |             |             |                 |              |
| Low                      | 23 (32.39%) | 100%        | 100%            | NA           |
| Intermediate             | 30 (42.25%) | 95%         | 80%             | NA           |
| High                     | 18 (25.35%) | 48%         | 24%             | NA           |
| CHCAOMS cohort 1, n = 84 |             |             |                 |              |
| Low                      | 44 (52.38%) | 100%        | 100%            | NA           |
| Intermediate             | 31 (36.90%) | 75%         | NA              | NA           |
| High                     | 9 (10.71%)  | 76%         | NA              | NA           |
| CHCAOMS cohort 2, n = 55 |             |             |                 |              |
| Low                      | 28 (50.91%) | 100%        | 100%            | 100%         |
| Intermediate             | 19 (34.55%) | 92%         | 83%             | 83%          |
| High                     | 8 (14.55%)  | 72%         | 18%             | NA           |

PFS Progression Free Survival; NA Not Applied.

**Supplementary Table 9: Cumulative survival analysis of the patients stratified by integrated risk model and WHO grade in discovery cohort (SYSUCC) and three validation cohorts of primary CNS SFTs with NTM.**

| Classification     | Number (%)  | 3 years PFS | 5 years PFS | 10 years PFS |
|--------------------|-------------|-------------|-------------|--------------|
| Integrated model   |             |             |             |              |
| Low                | 8 (22.22%)  | 100%        | 100%        | NA           |
| Intermediate       | 10 (27.78%) | 100%        | 78%         | NA           |
| High               | 18 (50.00%) | 38%         | 0%          | 0%           |
| 2021 CNS WHO Grade |             |             |             |              |
| Grade1             | 17 (47.22%) | 88%         | 66%         | NA           |
| Grade2             | 5 (13.89%)  | 71%         | NA          | NA           |
| Grade3             | 14 (38.89%) | 46%         | 10%         | NA           |

PFS Progression Free Survival; CNS Central Nervous System; WHO World Health Organization; NA Not Applied.

**Supplementary Table 10: C-index of integrated risk model, 2021 WHO grade in primary CNS SFTs with NTM from the four cohorts.**

| Classification   | C-index (95%CI)     | <i>P</i> value |
|------------------|---------------------|----------------|
| Integrated model | 0.901 (0.833-0.969) | 4.88E-31       |
| 2021 WHO Grade   | 0.802 (0.709-0.895) | 2.42E-10       |

CI Confidence Interval; WHO World Health Organization; *P* values were tested using the z-test. Source data are provided as a Source Data file.

**Supplementary Table 11: C-index of integrated risk model, WHO classification in relapsed non-CNS SFTs with NTM from the four cohorts.**

| Classification     | C-index (95%CI)     | <i>P</i> value |
|--------------------|---------------------|----------------|
| Integrated model   | 0.550 (0.375-0.725) | 0.576          |
| WHO classification | 0.520 (0.410-0.630) | 0.721          |

CI Confidence Interval; WHO World Health Organization; *P* values were tested using the z-test. Source data are provided as a Source Data file.



**Supplementary Table 12: C-index of integrated risk model, WHO classification, mDemicco model, and G-score of PFS, MFS, and RFI in discovery SYSUCC cohort and the three validation cohorts (FAHSYSU and CHCAMS 1 and CHCAMS 2).**

| Classification     | C-index (95%CI)-PFS | <i>P</i> value | C-index (95%CI)-MFS | <i>P</i> value | C-index (95%CI)-RFI | <i>P</i> value |
|--------------------|---------------------|----------------|---------------------|----------------|---------------------|----------------|
| Integrated model   | 0.890 (0.848-0.932) | 4.90E-75       | 0.907 (0.834-0.980) | 2.73E-28       | 0.882 (0.834-0.930) | 1.80E-54       |
| WHO classification | 0.773 (0.693-0.853) | 3.09E-11       | 0.820 (0.703-0.937) | 7.71E-08       | 0.750 (0.655-0.845) | 2.27E-07       |
| mDemicco model     | 0.809 (0.736-0.883) | 1.43E-16       | 0.767 (0.607-0.927) | 1.02E-03       | 0.782 (0.694-0.870) | 3.45E-10       |
| G-score            | 0.784 (0.691-0.877) | 2.56E-09       | 0.734 (0.573-0.895) | 4.40E-03       | 0.743 (0.636-0.850) | 7.52E-06       |

CI Confidence Interval; PFS Progression Free Survival; MFS Metastasis Free Survival; RFI Recurrence Free Interval; WHO

World Health Organization; *P* values were tested using the z-test. Source data are provided as a Source Data file.

**Supplementary Table 13: Cumulative survival of the patients stratified by integrated risk model, WHO classification, mDemicco model, and G-score for all primary non-CNS SFTs with NTM (n = 311).**

| Classification             | Number (%)   | 3 yeras-<br>PFS | 5 years-<br>PFS | 10 yeras-<br>PFS | 3 yeras-<br>MFS | 5 years-<br>MFS | 10 yeras-<br>MFS | 3 yeras-<br>RFI | 5 years-<br>RFI | 10 yeras-<br>RFI |
|----------------------------|--------------|-----------------|-----------------|------------------|-----------------|-----------------|------------------|-----------------|-----------------|------------------|
| WHO classification         |              |                 |                 |                  |                 |                 |                  |                 |                 |                  |
| Locally aggressive, Benign | 243 (78.14%) | 96%             | 93%             | 91%              | 100%            | 98%             | 98%              | 97%             | 93%             | 92%              |
| Rarely metastasizing, NOS  | 15 (4.82%)   | 92%             | 92%             | NA               | 92%             | 92%             | NA               | 92%             | 92%             | NA               |
| Malignant                  | 53 (17.04%)  | 63%             | 40%             | 26%              | 88%             | 61%             | 61%              | 73%             | 46%             | 30%              |
| Integrated model           |              |                 |                 |                  |                 |                 |                  |                 |                 |                  |
| Low                        | 158 (50.80%) | 100%            | 100%            | 100%             | 100%            | 100%            | 100%             | 100%            | 100%            | 100%             |
| Intermediate               | 111 (35.69%) | 87%             | 73%             | 57%              | 98%             | 87%             | 87%              | 90%             | 75%             | 58%              |
| High                       | 42 (13.50%)  | 59%             | 21%             | NA               | 85%             | 42%             | NA               | 71%             | 25%             | NA               |
| mDemicco                   |              |                 |                 |                  |                 |                 |                  |                 |                 |                  |
| Low                        | 229 (73.63%) | 96%             | 93%             | 91%              | 99%             | 99%             | 99%              | 97%             | 94%             | 92%              |
| Intermediate               | 62 (19.94%)  | 83%             | 71%             | 71%              | 92%             | 79%             | 79%              | 87%             | 75%             | 75%              |
| High                       | 20 (6.43%)   | 56%             | 25%             | NA               | 93%             | 54%             | NA               | 68%             | 31%             | NA               |
| G-score                    |              |                 |                 |                  |                 |                 |                  |                 |                 |                  |
| Low                        | 117 (37.62%) | 96%             | 90%             | 90%              | 99%             | 99%             | 99%              | 96%             | 90%             | 90%              |
| Intermediate               | 142 (45.66%) | 94%             | 88%             | 88%              | 97%             | 93%             | 93%              | 94%             | 88%             | 88%              |
| High                       | 52 (16.72%)  | 67%             | 50%             | 27%              | 92%             | 69%             | 69%              | 80%             | 60%             | 32%              |

PFS Progression Free Survival; MFS Metastasis Free Survival; RFI Recurrence Free Interval; WHO World Health Organization; NOS Not Otherwise Specified; NA Not Applied.

**Supplementary Table 14: The detailed information of the antibody used.**

| Target Protein                      | Host               | Vendor                    | Catalog             | Clone       | Function                | Dilution     | RRID        |
|-------------------------------------|--------------------|---------------------------|---------------------|-------------|-------------------------|--------------|-------------|
| STAT6                               | Rabbit             | MXB Biotechnologies       | RMA-0845            | EP325       | Tumor cells             | Ready to use | AB_778113   |
| Ki-67                               | Rabbit             | MXB Biotechnologies       | RMA-0731            | MXR002      | Proliferation           | Ready to use | --          |
| CD68                                | Mouse              | MXB Biotechnologies       | Kit-0026            | KP1         | Macrophage              | Ready to use | --          |
| CD163                               | Mouse              | MXB Biotechnologies       | MAB-0206            | 10D6        | Macrophage              | Ready to use | --          |
| HLA-DPB1                            | Rabbit             | Abcam                     | ab157210            | EPR11226    | T cells, Tumor cells    | 1:3000       | AB_2827533  |
| PD-L1                               | Rabbit             | Cell signaling technology | Cat# 13684S         | E1L3N       | Tumor cells, Macrophage | 1:300        | AB_2687655  |
| CD3                                 | Rabbit             | MXB Biotechnologies       | Kit-0003            | SP7         | T cell                  | Ready to use | --          |
| CD4                                 | Rabbit             | MXB Biotechnologies       | RMA-0620            | SP35        | T cell                  | Ready to use | --          |
| CD8                                 | Rabbit             | MXB Biotechnologies       | RMA-0514            | SP16        | T cell                  | Ready to use | --          |
| FOXP3                               | Mouse              | Biolegend                 | 320102              | 206D        | Treg cell               | 1:400        | AB_430881   |
| CD11c                               | Rabbit             | Abcam                     | ab52632             | EP1347Y     | Dendritic cell          | 1:300        | AB_2129793  |
| CD20                                | Rabbit             | MXB Biotechnologies       | Kit-0001            | L26         | B cell                  | Ready to use | --          |
| CD68                                | Rabbit             | Cell signaling technology | 79594S              | D4B9C       | Macrophage              | 1:100        | AB_2799935  |
| CD163                               | Rabbit             | Abcam                     | ab218294            | EPR14643-36 | Macrophage              | 1:100        | AB_2889155  |
| CD206                               | Mouse              | Santa Cruz Biotechnology  | sc-376108 AF488 D-1 | D-1         | Macrophage              | 1:100        | AB_10987732 |
| STAT6                               | Rabbit             | Abcam                     | ab207014            | YE361       | Tumor cells             | 1:100        | AB_2889256  |
| PD-L1                               | Rabbit             | Abcam                     | ab267563            | SP142       | Tumor cells, Macrophage | 1:100        | AB_2827816  |
| PD1                                 | Rabbit             | Abcam                     | ab201825            | EPR4877(2)  | T cells                 | 1:100        | AB_2728811  |
| CD8a                                | Mouse              | eBioscience               | 50-0008-80          | AMC908      | T cells                 | 1:100        | AB_2574148  |
| CD4                                 | Mouse              | eBioscience               | 41-2444-80          | N1UG0       | T cells                 | 1:100        | AB_2573601  |
| Secondary Antibody, Alexa Fluor 488 | Chicken anti-Goat  | ThermoFisher              | A-21467             | --          | --                      | 1:500        | --          |
| Secondary Antibody, Alexa Fluor 555 | Goat anti-Rabbit   | ThermoFisher              | A-21428             | --          | --                      | 1:500        | --          |
| Secondary Antibody, Alexa Fluor 647 | Chicken anti-Mouse | ThermoFisher              | A-21463             | --          | --                      | 1:500        | --          |
| Secondary Antibody                  | anti-Mouse/Rabbit  | MXB Biotechnologies       | KIT-5020            | --          | --                      | Ready to use | --          |

**Supplementary Table 15: PCR Primer sequences for *MTOR* and *IDH1*.**

| Gene        | Primer sequence              | T <sub>m</sub> |
|-------------|------------------------------|----------------|
| <i>MTOR</i> |                              |                |
| Fm-1        | 5'- CATACGCCCCATCATCACC      | 60°C           |
| Rm-1        | 5'- ATTCCACGTACTCAGCGGTA     |                |
| Fm-2        | 5'- CATAACTTCTTTCTCTAGGCAT   | 57°C           |
| Rm-2        | 5'- CCGCAATAAATATGTGAGACC    |                |
| Fm-3        | 5'- ACTCTAGGGGAATTTTATCGT    | 55°C           |
| Rm-3        | 5'- GCCCTGACACACTATACCTG     |                |
| Fm-4        | 5'- TTGCCTTTCTCCCAACCAG      | 59°C           |
| Rm-4        | 5'- TGGCACTTCAGATACAGC       |                |
| <i>IDH1</i> |                              |                |
| Forward     | 5'- TGTGTTGAGATGGACGCCTATTTG | 56°C           |
| Reverse     | 5'- TGCCACCAACGACCAAGTCA     |                |

T<sub>m</sub> Melting Temperature; F Forward; R Reverse.

**Supplementary Table 16: Sequence of primers used for *NAB2-STAT6* fusion.**

| <i>NAB2-STAT6</i>         | Primer sequence            | Fusion variants | Size(s) of PCR product(s) obtained | T <sub>m</sub> (°C) |
|---------------------------|----------------------------|-----------------|------------------------------------|---------------------|
| <i>NAB2</i> ex3 forward   | 5'- GCCCGAGAGAGCACCTACTT   | 4-2             | 173bp                              | 58                  |
| <i>STAT6</i> ex2 reverse  | 5'-ACATAGAGCCGCTGCACTTT    |                 |                                    |                     |
| <i>NAB2</i> ex4 forward   | 5'-GCTTCACCCTGAAGAACTGG    | 4-4             | 202bp                              | 58                  |
| <i>STAT6</i> ex5 reverse  | 5'-CCGCAAGCCTGTCTTAACT     |                 |                                    |                     |
| <i>NAB2</i> ex6 forward   | 5'-ACATCCTGCAGCAGACACTG    | 6-17; 6-16      | 199bp; 346bp                       | 58                  |
| <i>STAT6</i> ex18 reverse | 5'-TCTGGGGTAGGAAGTGGTTG    |                 |                                    |                     |
| <i>NAB2</i> ex6 forward   | 5'-AGCAGACACTGATGGACGAG    | 6-16            | 219bp                              | 58                  |
| <i>STAT6</i> ex16 reverse | 5'-TGGGCTTCTTGGGATAGAGA    |                 |                                    |                     |
| <i>NAB2</i> ex5 forward   | 5'-GTCACCCTGAAATCCAGCAG    | 6-18            | 403bp                              | 58                  |
| <i>STAT6</i> ex18 reverse | 5'-CATGCTCATGGAGGAATCAG    |                 |                                    |                     |
| <i>NAB2</i> ex2 forward   | 5'-CATCTATGGCCGTTTCGACT    | 2-5             | 124bp                              | 58                  |
| <i>STAT6</i> ex5 reverse  | 5'-CCGCAAGCCTGTCTTAACT     |                 |                                    |                     |
| <i>NAB2</i> ex5 forward   | 5'-GTCTGGGGAGAGTCTGGATG    | 5-3; 6-3        | 106bp; 298bp                       | 58                  |
| <i>STAT6</i> ex3 reverse  | 5'-GGTGCTGGACAGTGTCTGAA    |                 |                                    |                     |
| <i>NAB2</i> ex2 forward   | 5'-CATCTATGGCCGTTTCGACT    | 3-19            | 228bp                              | 58                  |
| <i>STAT6</i> ex19 reverse | 5'-GGGATGGAGTGAGAGTGTGG    |                 |                                    |                     |
| <i>GAPDH</i> forward      | 5'-GGAGCGAGATCCCTCCAAAAT   |                 | 197bp                              | 58                  |
| <i>GAPDH</i> reverse      | 5'-GGCTGTTGTCATACTTCTCATGG |                 |                                    |                     |

PCR Polymerase Chain Reaction; T<sub>m</sub> Melting Temperature.
